# Supplementary material for: Synergistic effect of a Bi 2 Zr 2 O 7 and hydroxyapatite composite: organic pollutant remediation, antibacterial and electrochemical sensing applications
Source: Royal Society of Chemistry journal article supplement (doi:10.1039/d3ra05222b), 2023-01-01
Supplement: d3ra05222b1.pdf [file d3ra05222b1.pdf]

## Synergistic effect of $\text{Bi}_2\text{Zr}_2\text{O}_7$ and hydroxyapatite composite: Organic pollutant remediation, antibacterial and electrochemical sensing applications

K. Pompathi<sup>a,b</sup>, K. S. Anantharaju<sup>\*a,c</sup>, B. S. Surendra<sup>c</sup>, S Meena<sup>c</sup>, B Uma<sup>c</sup>,  
Arpita Paul Chowdhury<sup>\*\*c</sup>, H. C. Ananda Murthy<sup>\*\*\*d,e</sup>

<sup>a</sup>Dr. D. Premachandra Sagar Centre for Advanced Materials, Dayananda Sagar College of Engineering, Shavige Malleshwara Hills, Kumaraswamy layout, Bengaluru -560111, India

<sup>b</sup>Department of Material Science, Mangalore University, Mangalagangothri, Mangalore-574199, Karnataka, India.

<sup>c</sup>Department of Chemistry, Dayananda Sagar College of Engineering, Shavige Malleshwara Hills, Kumaraswamy layout, Bengaluru -560111, India.

<sup>d</sup>Department of Applied Chemistry, School of Applied Natural Science, Adama Science and Technology University, Adama, P O Box 1888, Ethiopia.

<sup>e</sup>Department of Prosthodontics, Saveetha Dental College & Hospital, Saveetha Institute of Medical and Technical Science (SIMATS), Saveetha University, Chennai 600077, Tamil Nadu, India.

Corresponding Authors: \*Dr. K. S. Anantharaju ([iamananth4477@gmail.com](mailto:iamananth4477@gmail.com))

\*\*Dr. Arpita Paul Chowdhury ([chemarpitachowdhury@gmail.com](mailto:chemarpitachowdhury@gmail.com))

\*\*\*Dr. H. C. Ananda Murthy ([anandkps350@gmail.com](mailto:anandkps350@gmail.com))

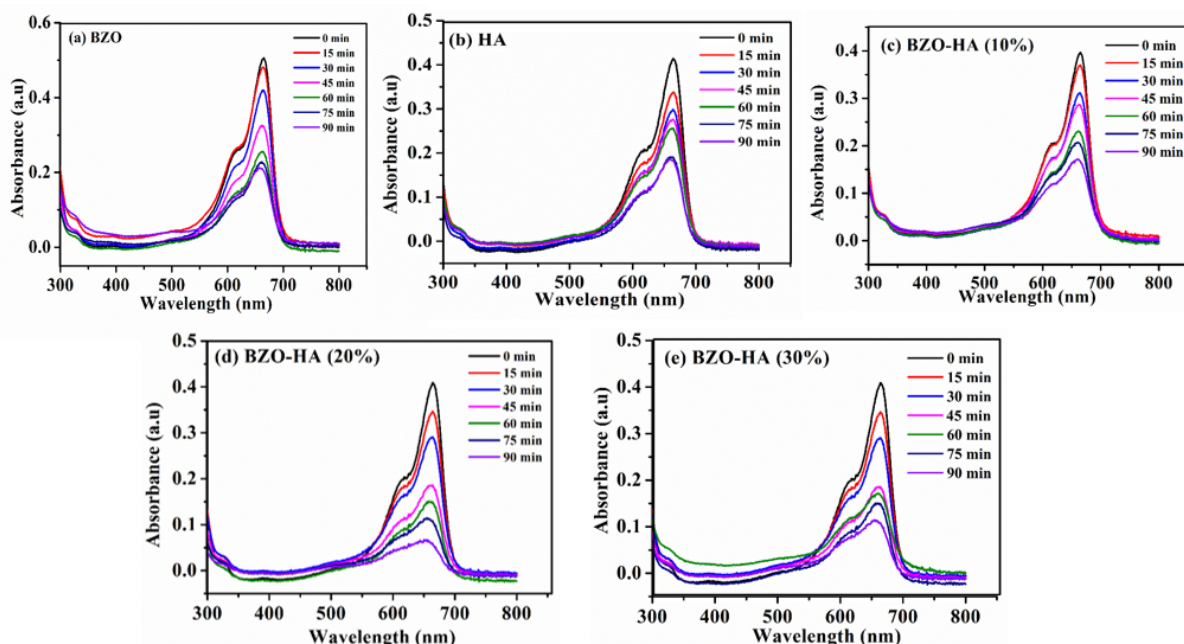

Fig. S1. Absorbance spectra of MB dye in the presence of (a) BZO, (b) HA, (c) BZO-HA (10%), (d) BZO-HA (20%), (e) BZO-HA (30%).

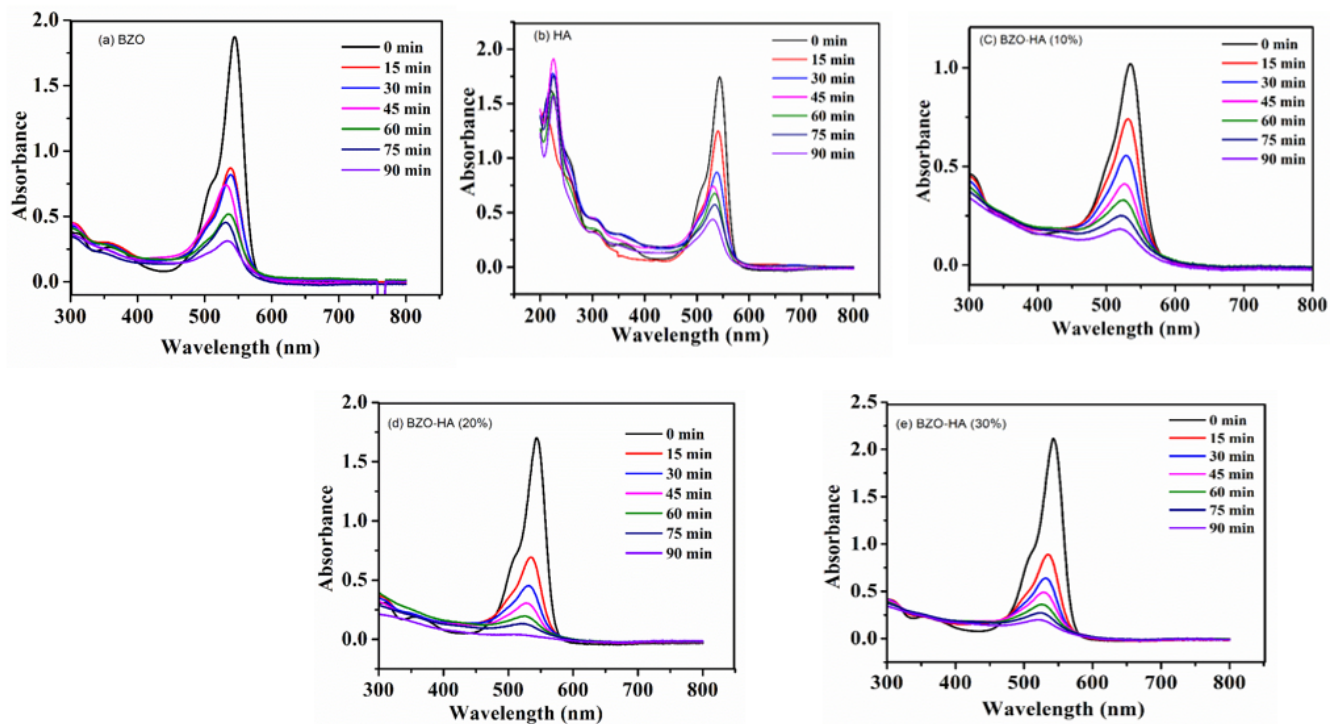

Fig. S2. Absorbance spectra of RB dye in the presence of (a) BZO, (b) HA, (c) BZO-HA (10%), (d) BZO-HA (20%), (e) BZO-HA (30%).
